# Supplementary material for: Ionic liquid-coated Fe3O4 magnetic nanoparticles as an adsorbent of mixed hemimicelles solid-phase extraction for preconcentration of polycyclic aromatic hydrocarbons in environmental samples
Source: Royal Society of Chemistry journal article supplement (doi:10.1039/c0an00245c), 2010-01-01
Supplement: c0an00245c.pdf [file c0an00245c.pdf]

## Electronic Supplementary Information

Ionic liquid-coated Fe<sub>3</sub>O<sub>4</sub> magnetic nanoparticles as adsorbent of mixed hemimicelles solid-phase extraction for preconcentration of polycyclic aromatic hydrocarbons in environmental samples

Qianli Zhang, Fei Yang, Fei Tang, Kai Zeng, Kangkang Wu,

Qingyun Cai\*, Shouzhuo Yao\*

*State Key Lab of Chemo/Biosensing & Chemometrics, College of Chemistry & Chemical Engineering, Hunan University, Changsha 410082, China*

**Correspondence:** Prof. Shouzhuo Yao. State Key Lab of Chemo/Biosensing & Chemometrics, College of Chemistry & Chemical Engineering, Hunan University, Changsha 410082, China. Fax: +86-731-88821848. Email: [szyao@hnu.cn](mailto:szyao@hnu.cn).

This supporting information contains 3 figures.

## 1. NMR and MS characterizations of the prepared ILs

The prepared ILs were characterized by NMR (Figure S1) and mass spectrometry (Figure S2). The positive ion mode (ESI+) was used for MS analysis. The ESI/MS conditions were as follows: capillary voltage, 3.5 kV; cone voltage, 30 V; range of mass scan, 100–800; desolvation temperature, 250 °C; source temperature, 105 °C; flow rate of desolvation gas, 350 L h<sup>-1</sup>, nitrogen; flow rate of cone gas, 50 L h<sup>-1</sup>, nitrogen.

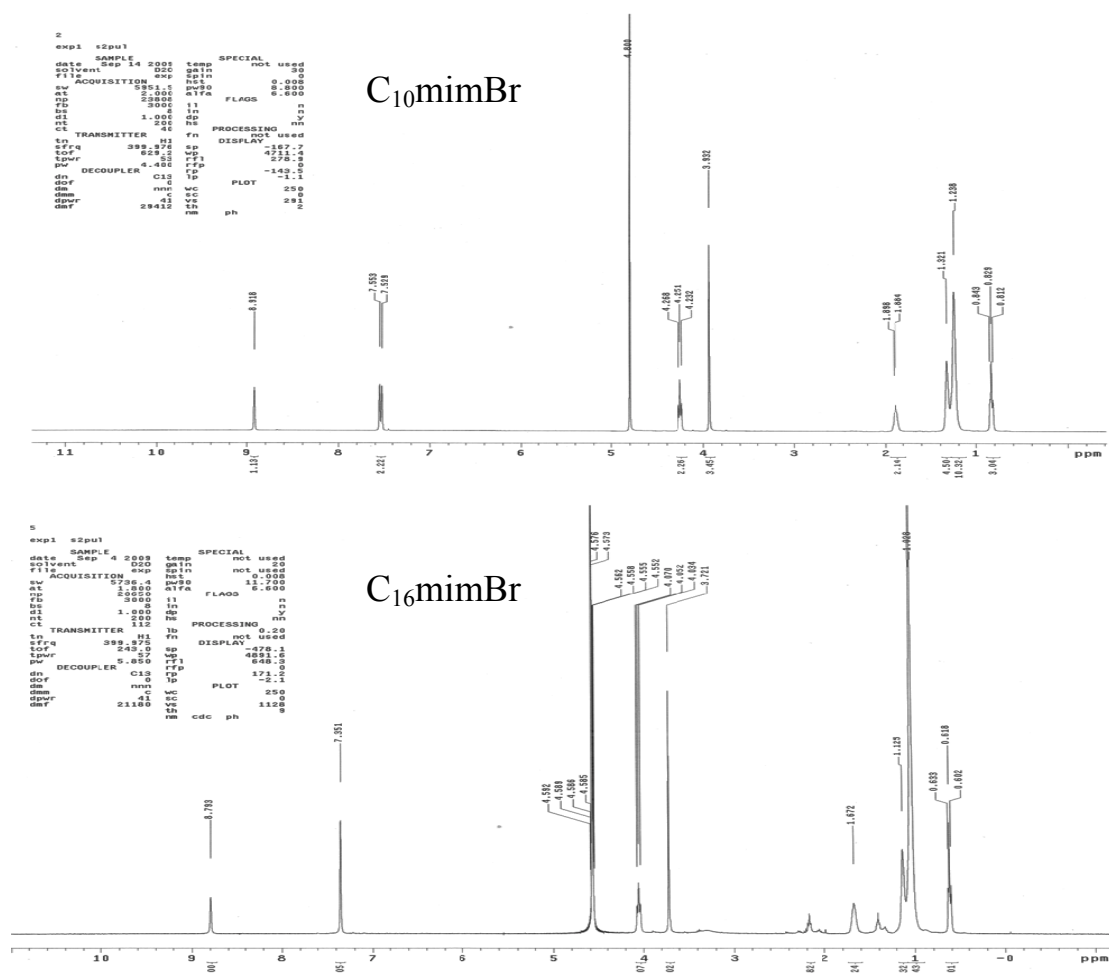

Figure S1. <sup>1</sup>H NMR spectrum of ILs.

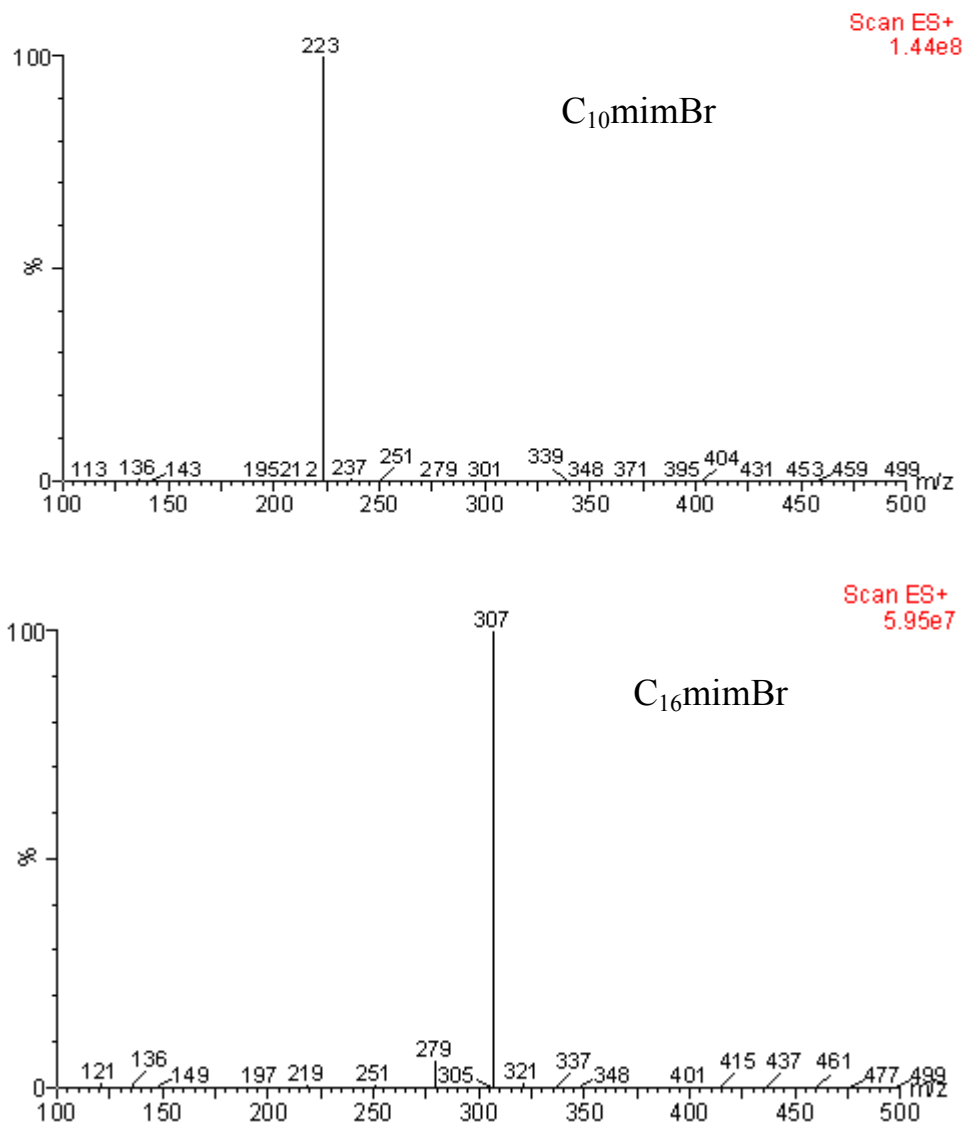

Figure S2. MS data of ILs.

## 2. IR spectroscopy of IL-coated $Fe_3O_4$ NPs

IR spectroscopy has been employed to qualitatively examine adsorption of  $C_{16}mimBr$  onto  $Fe_3O_4$  NPs surface. Figure S3 displays the IR spectrum of the  $Fe_3O_4$  NPs and the  $C_{16}mimBr$  coated  $Fe_3O_4$  NPs. Four characteristic bands can be distinguished in the IR spectrum of  $C_{16}mimBr$  coated  $Fe_3O_4$  NPs, while not observed in the  $Fe_3O_4$  NPs IR spectrum. Compared with the standard spectrum, the adsorption

bands at 2921 and 2852  $\text{cm}^{-1}$  could be attributed to the stretching vibration of C-H band; the characteristic bands at 1571 and 1469  $\text{cm}^{-1}$  indicate the vibration of N-H in imidazole ring. All of these bands revealed that  $\text{C}_{16}\text{mimBr}$  was successfully modified on the surface of  $\text{Fe}_3\text{O}_4$  NPs.

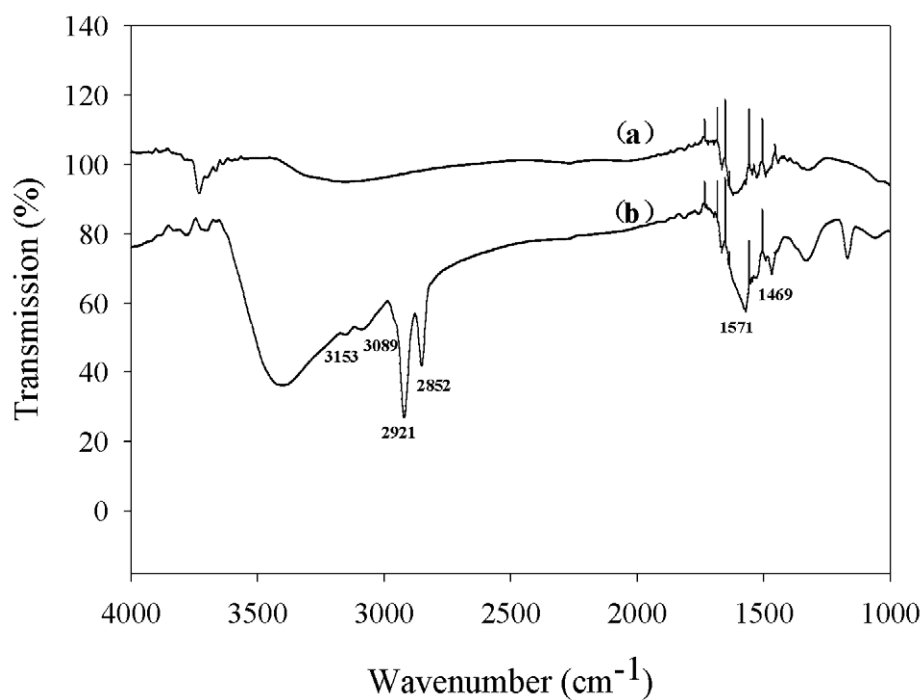

Figure S3. IR spectroscopy of  $\text{Fe}_3\text{O}_4$  NPs (a) and  $\text{C}_{16}\text{mimBr}$  coated  $\text{Fe}_3\text{O}_4$  NPs (b).
